# Supplementary material for: Chemical compatibility of polymer binders with a reversible anionic redox reaction in lithia-based cathodes
Source: Royal Society of Chemistry journal article supplement (doi:10.1039/d3ta00586k), 2023-01-01
Supplement: d3ta00586k1.pdf [file d3ta00586k1.pdf]

**Supporting Information**

**Chemical Compatibility of Polymer Binders with Reversible Anionic Redox Reaction in Lithia-based Cathodes†**

Ye Yeong Hwang,<sup>‡a</sup> Ji Hyun Han,<sup>‡a</sup> Sol Hui Park<sup>a</sup> and Yun Jung Lee<sup>\*a</sup>

---

<sup>a</sup> Department of Energy Engineering, Hanyang University, Seoul 04763, Republic of Korea. E-mail: [yjlee94@hanyang.ac.kr](mailto:yjlee94@hanyang.ac.kr); Tel: +82 2 2220 4121

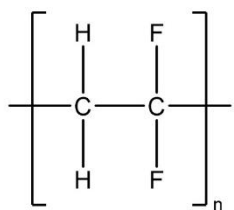

**PVDF**

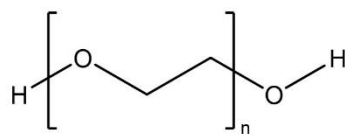

**PEO**

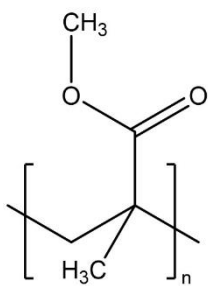

**PMMA**

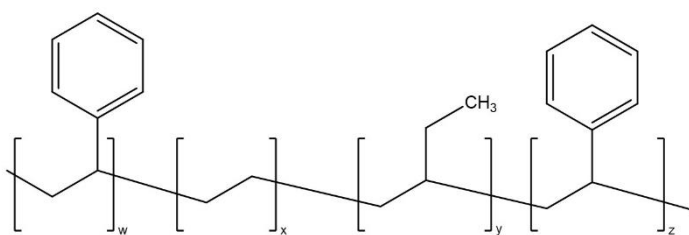

**SEBS**

**Fig. S1** Chemical structures of polymers studied herein.

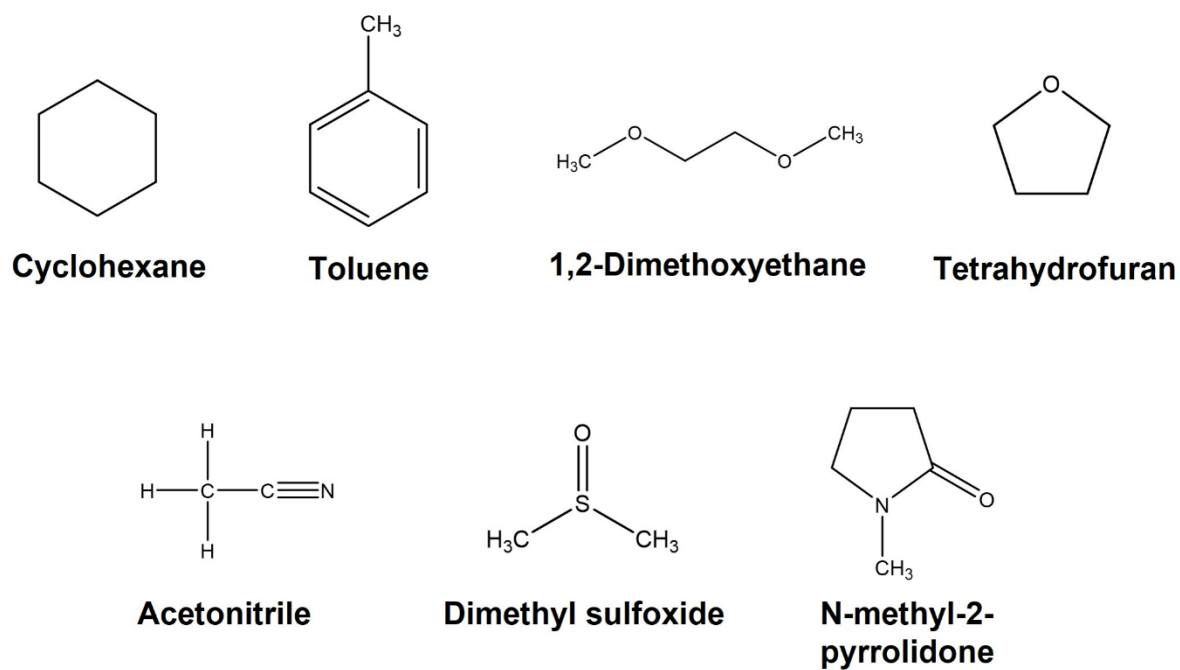

**Fig. S2** Chemical structures of various organic solvents studied herein.

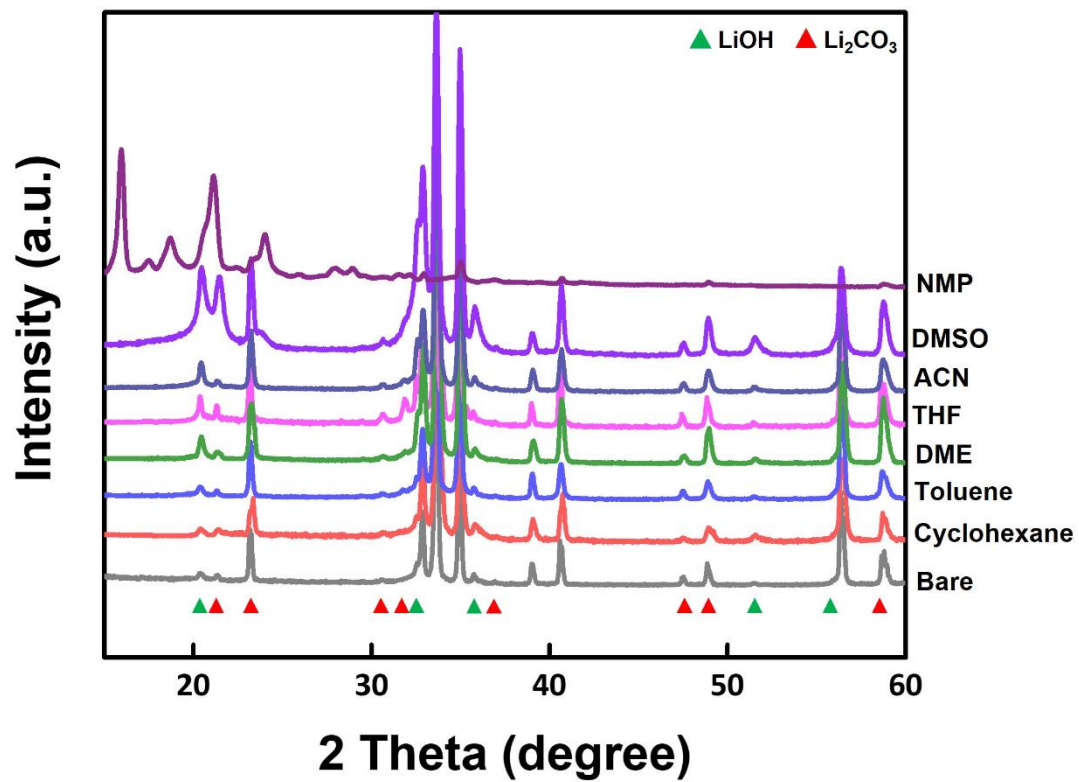

Fig. S3 XRD patterns of pristine lithia and lithia after treatment in various organic solvents.

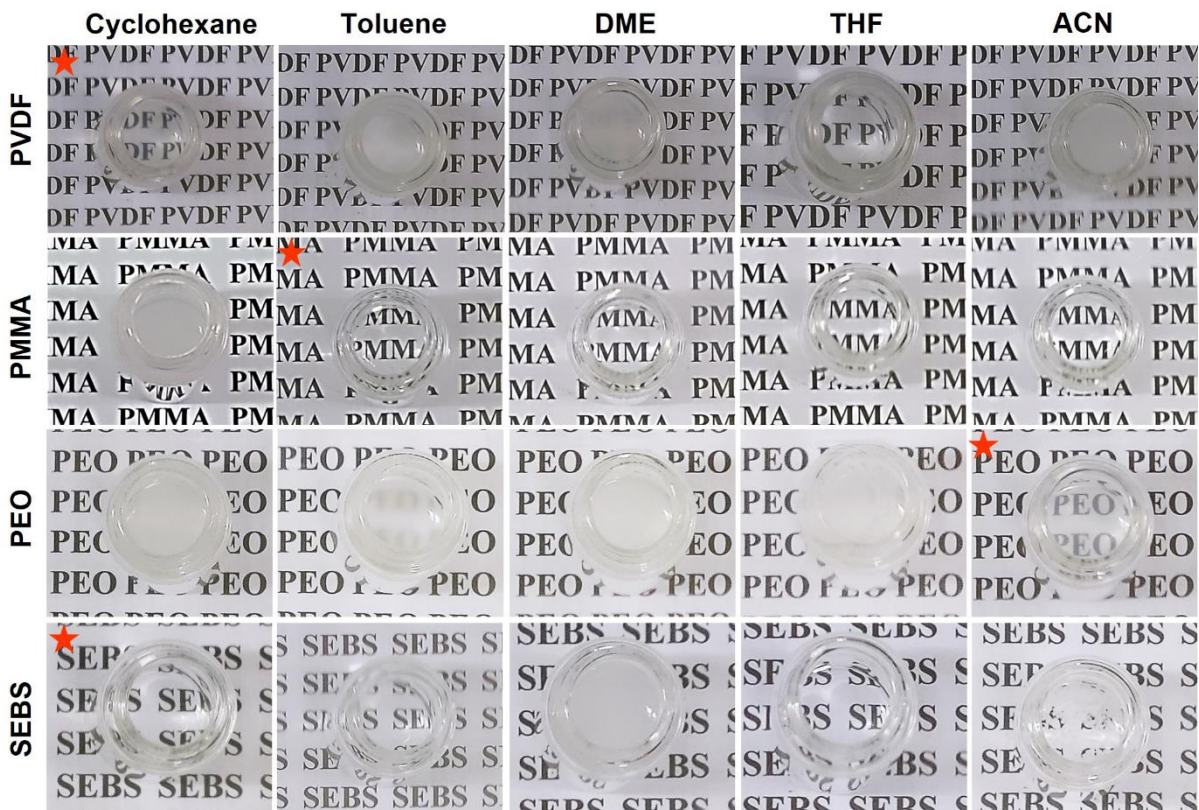

**Fig. S4** PVDF, PMMA, PEO, and SEBS polymer solutions in different organic solvents of cyclohexane, toluene, DME, THF, and ACN. The red-star-marked combinations are the polymer solution candidates for further evaluations.

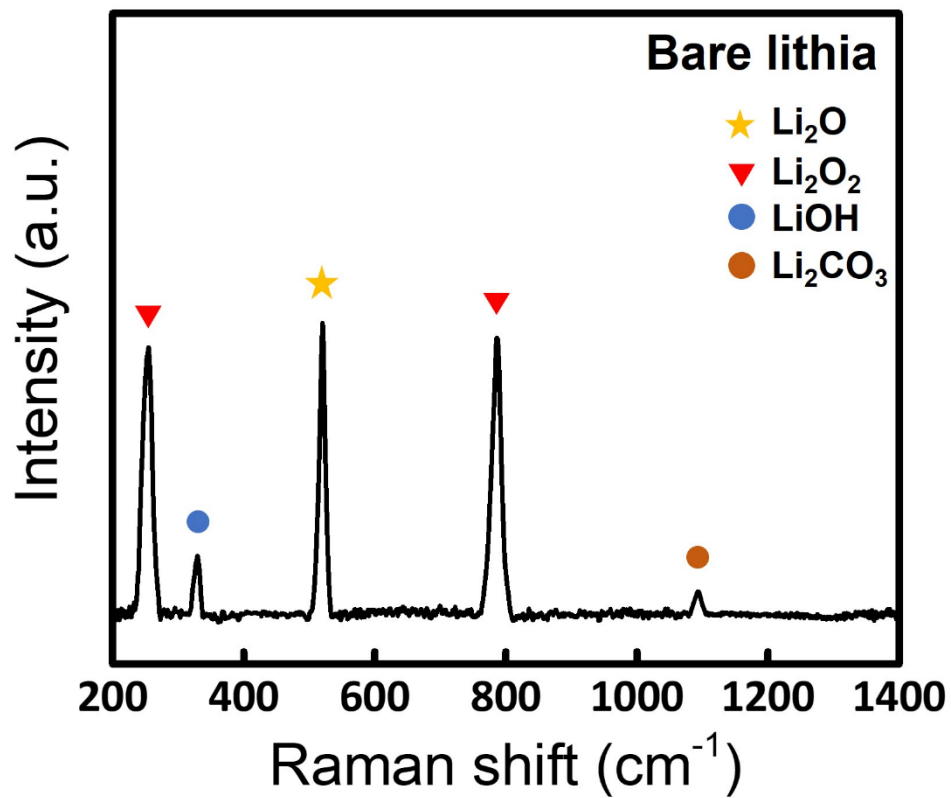

Fig. S5 Raman spectrum of the pristine heat-treated lithia.

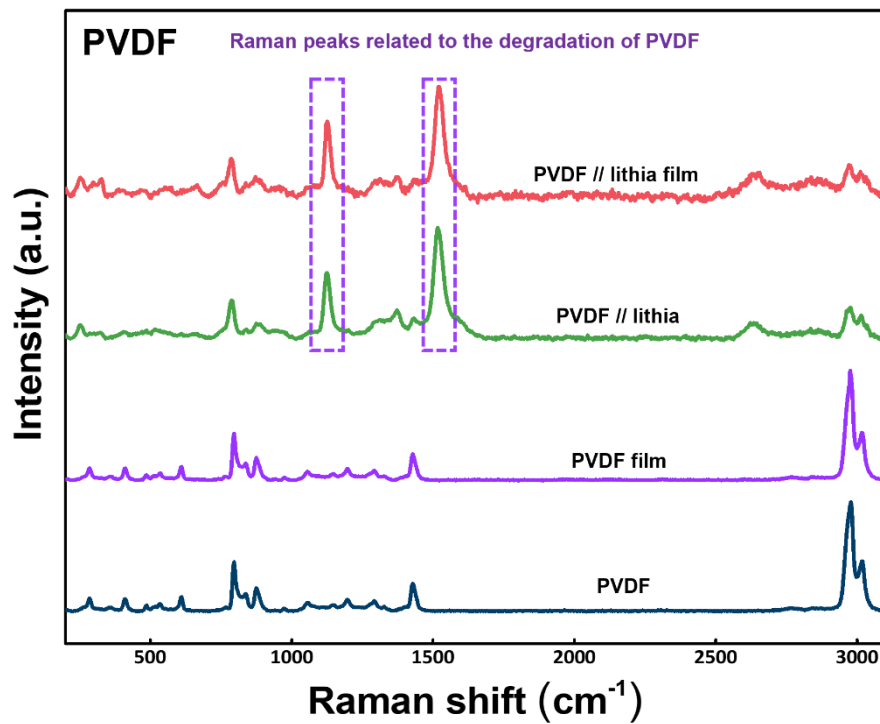

**Fig. S6** Raman spectra of PVDF powder, PVDF film prepared with cyclohexane, the powder mixture of PVDF and lithia, and the composite film of PVDF and lithia prepared with cyclohexane.

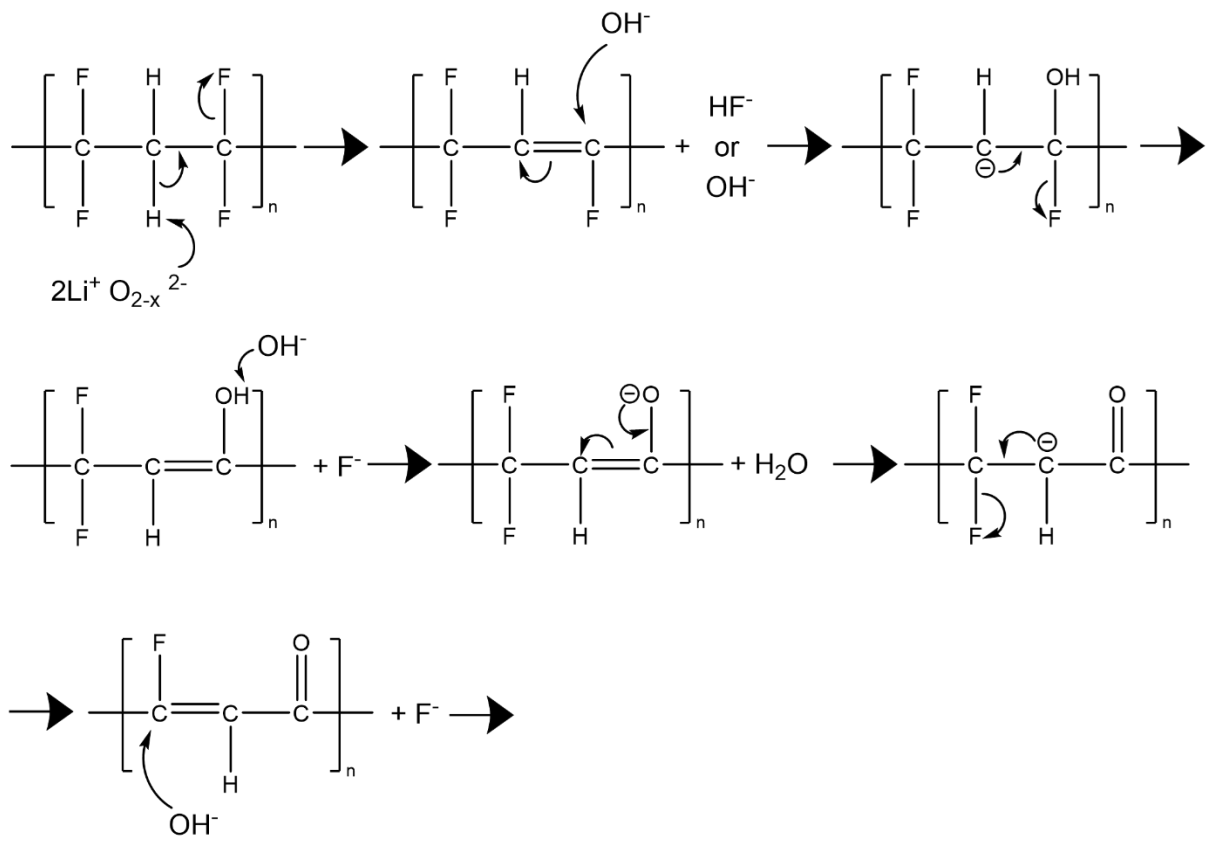

**Fig. S7** Possible mechanisms of PVDF degradation.



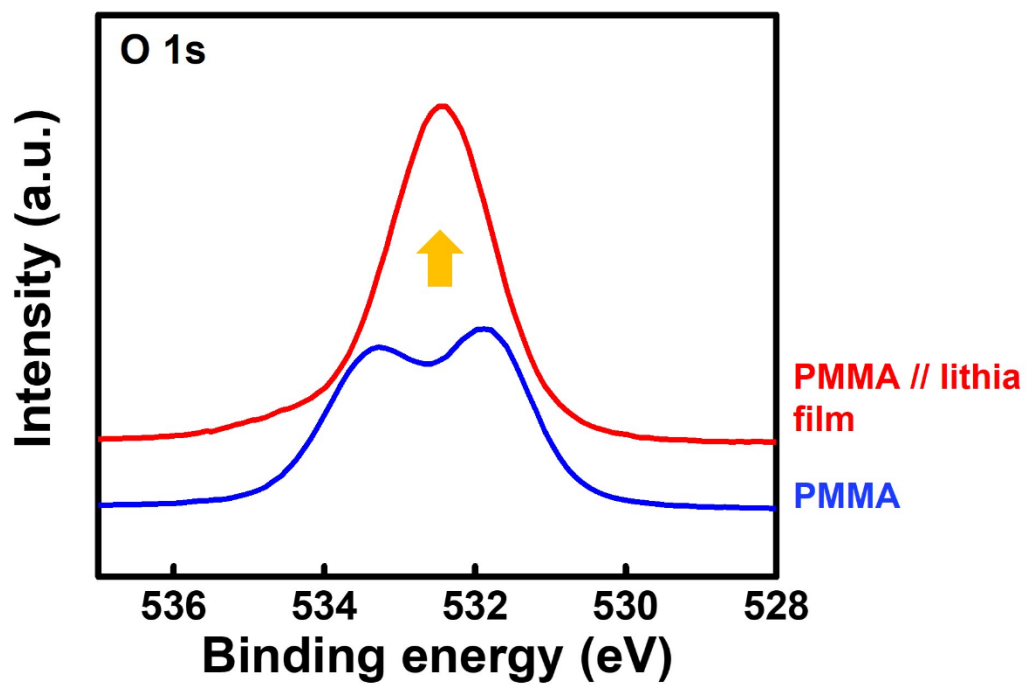

Fig. S8 O1s XPS profiles of PMMA powder (blue) and the composite film of PMMA and lithia prepared with toluene (red).

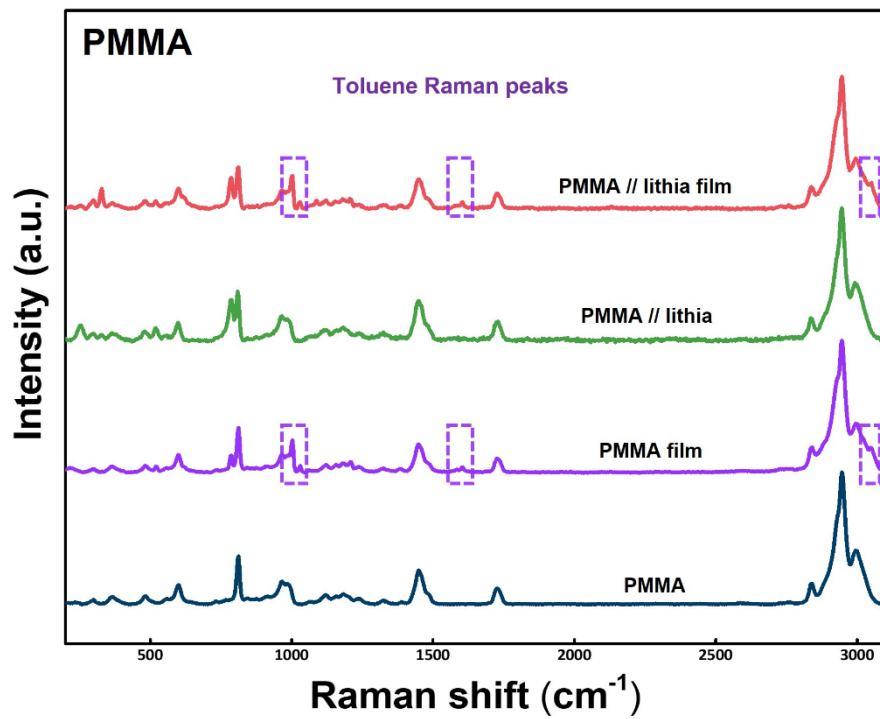

**Fig. S9** Raman spectra of PMMA powder, PMMA film prepared with toluene, the powder mixture of PMMA and lithia, and the composite film of PMMA and lithia prepared with toluene.

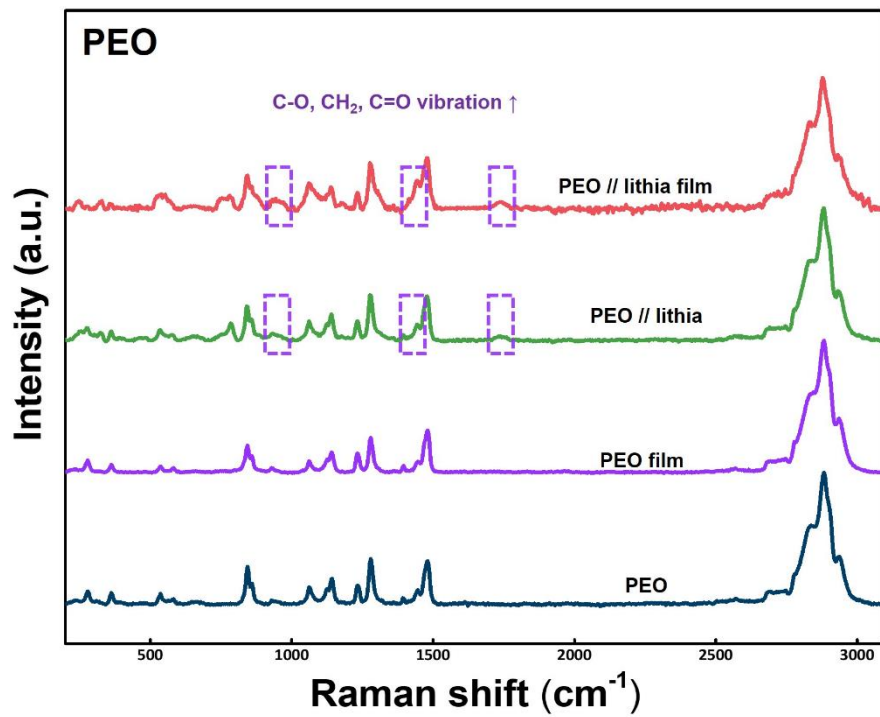

**Fig. S10** Raman spectra of PEO powder, PEO film prepared with ACN, the powder mixture of PEO and lithia, and the composite film of PEO and lithia prepared with ACN.

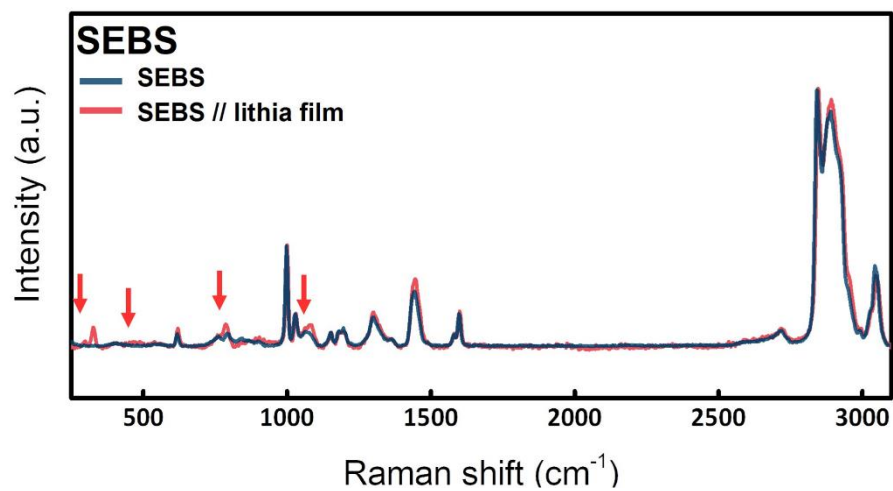

**Fig. S11** Raman spectra of SEBS powder (blue) and the composite film of SEBS and lithia prepared with cyclohexane (red). The red arrows indicate the base picks of lithia.

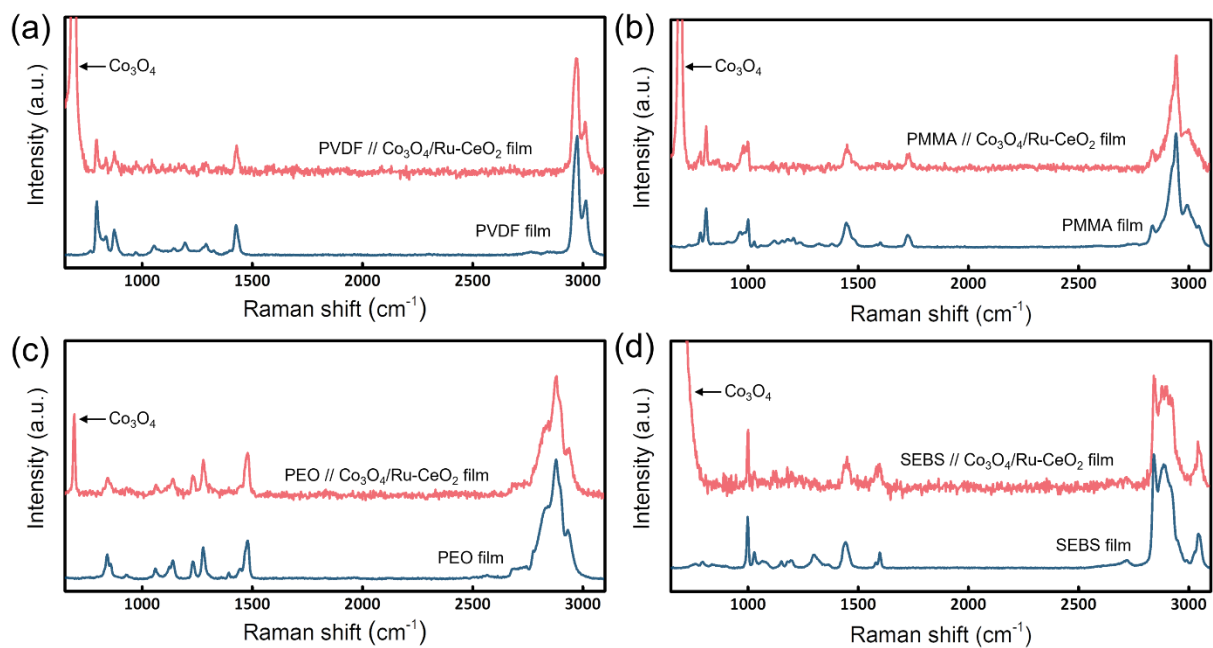

**Fig. S12** Raman spectra of the binder films and composite films of  $\text{Co}_3\text{O}_4/\text{Ru-CeO}_2$  prepared with (a) PVDF–cyclohexane, (b) PMMA–toluene, (c) PEO–ACN, and (d) SEBS–cyclohexane binders.

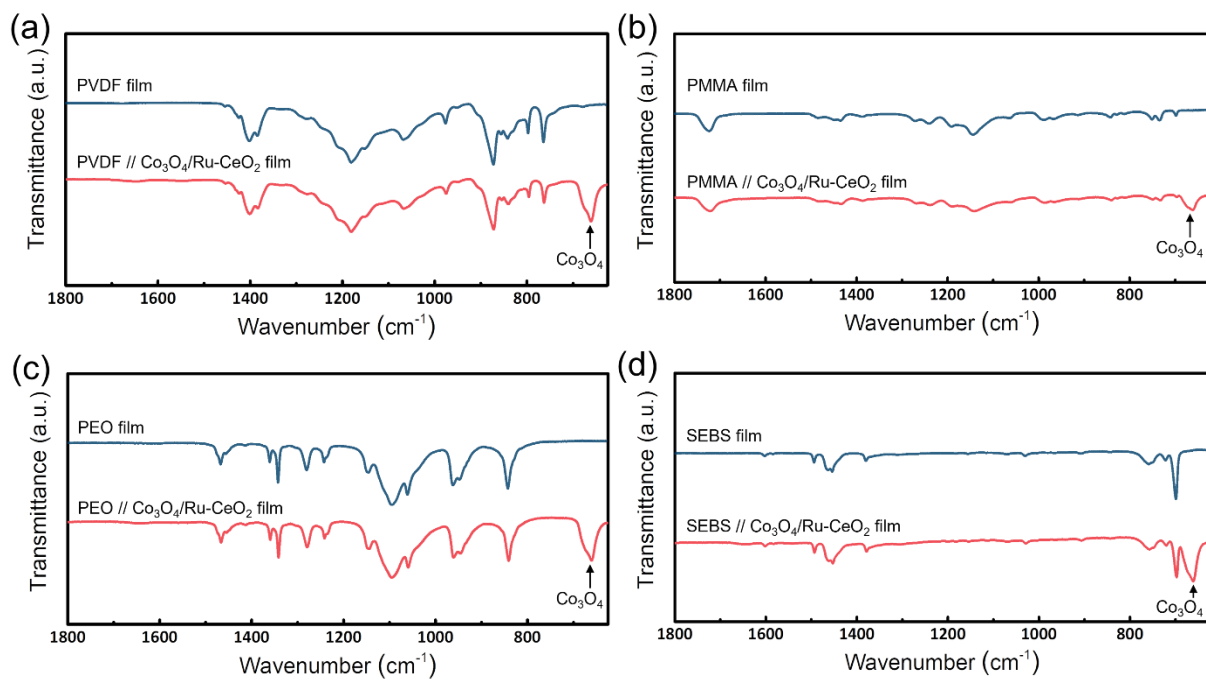

**Fig. S13** FT-IR spectra of the binder films and composite films of  $\text{Co}_3\text{O}_4/\text{Ru-CeO}_2$  prepared with (a) PVDF–cyclohexane, (b) PMMA–toluene, (c) PEO–ACN, and (d) SEBS–cyclohexane binders.
